# Supplementary material for: Crystal structures, phase transitions, and switchable dielectric behaviors: comparison of a series of N-heterocyclic ammonium perchlorates
Source: Royal Society of Chemistry journal article supplement (doi:10.1039/c5dt00263j), 2015-01-01
Supplement: c5dt00263j1.pdf [file c5dt00263j1.pdf]

Supporting information for:

## Crystal Structures, Phase Transitions, and Switchable Dielectric Behaviors: Comparison of a Series of N- heterocyclic Ammonium Perchlorates

Ping-Ping Shi, Qiong Ye\*, Qiang Li, Hui-Ting Wang, Da-Wei Fu, Yi  
Zhang and Ren-Gen Xiong\*

Ordered Matter Science Research Center, Southeast University, Nanjing 211189, P. R.

China

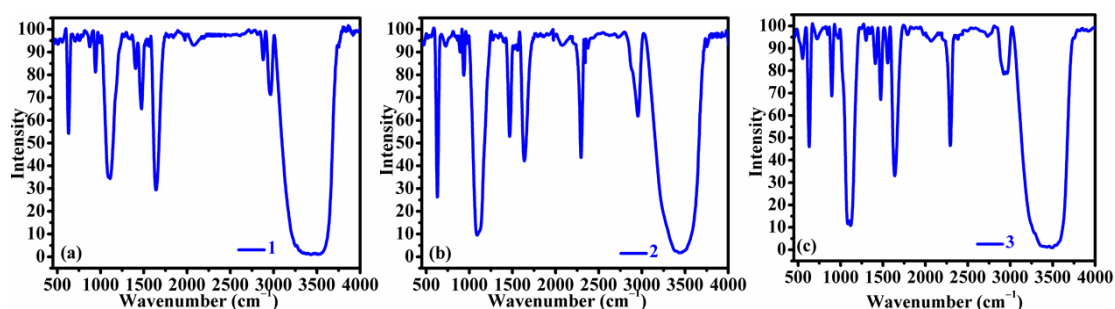

**Figure S1.** IR spectra of (a) [PMpip][ClO<sub>4</sub>] (**1**), (b) [CMpip][ClO<sub>4</sub>] (**2**), and (c) [CMmor][ClO<sub>4</sub>] (**3**) obtained at room temperature. The intense peaks at approximately 3500 cm<sup>-1</sup> are due to the moisture of the KBr.

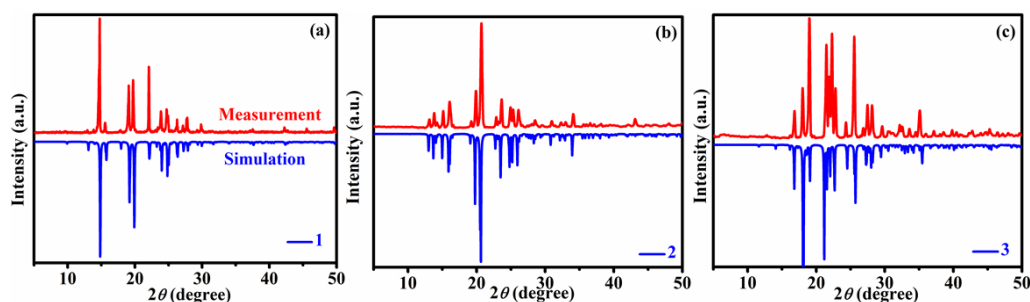

**Figure S2.** PXRD patterns of (a) [PMpip][ClO<sub>4</sub>] (**1**), (b) [CMpip][ClO<sub>4</sub>] (**2**), and (c)

[CMmor][ClO<sub>4</sub>] (**3**) recorded at 298 K (red line), in good agreement with the simulated data based on the crystal structures (blue line).

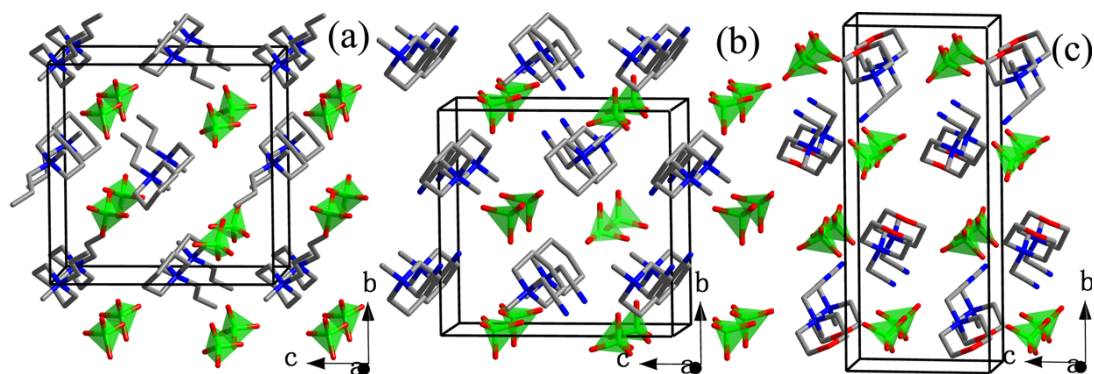

**Figure S3.** Packing diagrams of (a) [PMpip][ClO<sub>4</sub>] (**1**), (b) [CMpip][ClO<sub>4</sub>] (**2**) and (c) [CMmor][ClO<sub>4</sub>] (**3**) viewed down the *a* axis.

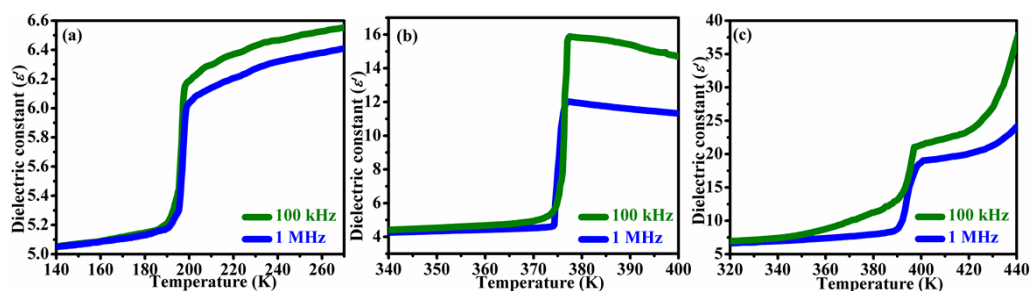

**Figure S4.** Temperature dependences of the real parts of dielectric constants ( $\epsilon'$ ) for (a) [PMpip][ClO<sub>4</sub>] (**1**), (b) [CMpip][ClO<sub>4</sub>] (**2**) and (c) [CMmor][ClO<sub>4</sub>] (**3**), measured in the cooling modes at 100 kHz and 1 MHz, respectively.

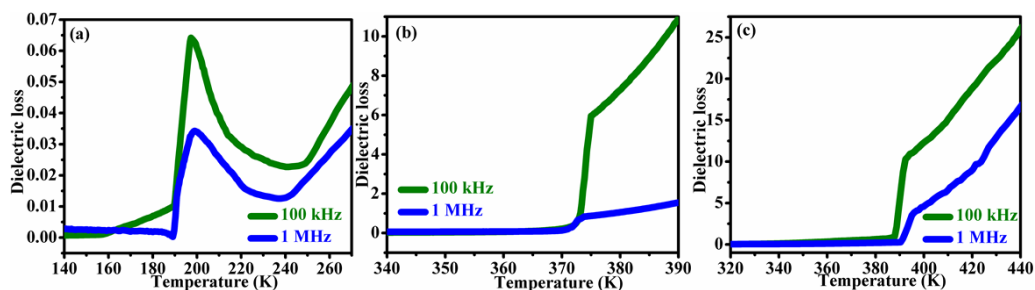

**Figure S5.** Temperature dependences of the dielectric losses for (a) [PMpip][ClO<sub>4</sub>]

(1), (b) [CMpip][ClO<sub>4</sub>] (2) and (c) [CMmor][ClO<sub>4</sub>] (3), measured in the cooling modes at 100 kHz and 1 MHz, respectively.

**Table S1. Equivalent isotropic displacement parameters ( $U_{\text{iso}}$ ) for [PMpip][ClO<sub>4</sub>]**

(1), [CMpip][ClO<sub>4</sub>] (2) and [CMmor][ClO<sub>4</sub>] (3)

| 1    |                                    | 2    |                                    | 3    |                                    |
|------|------------------------------------|------|------------------------------------|------|------------------------------------|
| Atom | $U_{\text{iso}}$ (Å <sup>2</sup> ) | Atom | $U_{\text{iso}}$ (Å <sup>2</sup> ) | Atom | $U_{\text{iso}}$ (Å <sup>2</sup> ) |
| C11  | 0.0729(2)                          | C11  | 0.0481(4)                          | C11  | 0.0436(3)                          |
| O1   | 0.194(2)                           | O1   | 0.1027(14)                         | O1   | 0.1051(12)                         |
| O2   | 0.272(2)                           | O2   | 0.0902(12)                         | O2   | 0.0991(11)                         |
| O3   | 0.182(2)                           | O3   | 0.0951(13)                         | O3   | 0.0692(7)                          |
| O4   | 0.278(2)                           | O4   | 0.1038(14)                         | O4   | 0.0967(10)                         |
| N1   | 0.0849(10)                         | N1   | 0.0342(7)                          | N1   | 0.0309(4)                          |
| C1   | 0.1310(17)                         | N2   | 0.0705(11)                         | N2   | 0.0899(12)                         |
| C2   | 0.163(2)                           | C1   | 0.0402(8)                          | O5   | 0.0529(6)                          |
| C3   | 0.1404(19)                         | C2   | 0.0546(10)                         | C1   | 0.0398(6)                          |
| C4   | 0.1090(15)                         | C3   | 0.0548(10)                         | C2   | 0.0503(7)                          |
| C5   | 0.1076(16)                         | C4   | 0.0458(9)                          | C3   | 0.0509(7)                          |
| C6   | 0.1154(17)                         | C5   | 0.0601(11)                         | C4   | 0.0454(6)                          |
| C7   | 0.180(3)                           | C6   | 0.0435(8)                          | C5   | 0.0465(6)                          |
| C8   | 0.174(2)                           | C7   | 0.0488(9)                          | C6   | 0.0456(6)                          |
| C9   | 0.151(2)                           | C8   | 0.0600(11)                         | C7   | 0.0569(8)                          |
